# Supplementary material for: Multimodal Intervention to Improve Functional Status in Hypertensive Older Adults: A Pilot Randomized Controlled Trial
Source: PubMed Central journal article supplement (PMC6406861; doi:10.3390/jcm8020196), 2019-02-06
Supplement: jcm-08-00196-s001.pdf [file jcm-08-00196-s001.pdf]

**Supplementary Table S1. Additional exclusion criteria.**

| <b>Exclusion Criteria</b>                                                                                                                                                                                   |
|-------------------------------------------------------------------------------------------------------------------------------------------------------------------------------------------------------------|
| Primary renal disease                                                                                                                                                                                       |
| Serum creatinine >2.5 mg/dL in men or >2.0 mg/dL in women                                                                                                                                                   |
| Serum potassium > 5.0 mEq/L                                                                                                                                                                                 |
| Urinary protein > 1 on dipstick                                                                                                                                                                             |
| Abnormal liver enzymes                                                                                                                                                                                      |
| Severe cardiac disease (i.e., New York Heart Association class III or IV congestive heart failure [76])                                                                                                     |
| Acute myocardial infarction identified by electrocardiogram                                                                                                                                                 |
| Significant cognitive impairment (defined as a known diagnosis or a Mini-Mental State Examination score <24 [77])                                                                                           |
| Inability to complete the 400-meter walk test within 15 minutes without sitting or interpersonal assistance (an indicator of disablement and likely inability to fully engage in the exercise intervention) |
| Regular participation in or absolute contraindications to exercise training according to the American College of Sport Medicine guidelines [38]                                                             |
| Other medical condition precluding safe participation                                                                                                                                                       |
| Simultaneous participation in another intervention trial                                                                                                                                                    |

**Supplementary Table S2.** Change in clinical safety parameters from baseline to 24-week follow-up according to the randomization group.

| <b>Outcomes</b>              | <b>Perindopril</b>          |                                            | <b>Losartan</b>                            |                                            | <b>HCTZ</b>                                |                                            |
|------------------------------|-----------------------------|--------------------------------------------|--------------------------------------------|--------------------------------------------|--------------------------------------------|--------------------------------------------|
|                              | <b>Overall<br/>Baseline</b> | <b>Adjusted Mean<br/>Change (95% CI) *</b> | <b>Adjusted Mean<br/>Change (95% CI) *</b> | <b>Adjusted Mean<br/>Change (95% CI) *</b> | <b>Adjusted Mean<br/>Change (95% CI) *</b> | <b>Adjusted Mean<br/>Change (95% CI) *</b> |
| <i>Basic metabolic panel</i> |                             |                                            |                                            |                                            |                                            |                                            |
| Sodium, mmol/L               | 139.9 (2.6)                 | -0.0 (-1.8, 1.7)                           | 1.6 (0.1, 3.1)                             | -0.5 (-2.2, 1.3)                           |                                            |                                            |
| Potassium, mmol/L            | 4.25 (0.27)                 | 0.3 (0.1, 0.6)                             | 0.0 (-0.2, 0.3)                            | -0.3 (-0.5, -0.0)                          |                                            |                                            |
| Chloride, mmol/L             | 102.4 (2.5)                 | 0.6 (-1.3, 2.6)                            | 0.4 (-1.3, 2.1)                            | -1.8 (-3.7, 0.1)                           |                                            |                                            |
| Carbon Dioxide, mmol/L       | 22.8 (3.1)                  | -0.1 (-2.3, 2.0)                           | -0.7 (-2.7, 1.3)                           | 1.6 (-0.6, 3.8)                            |                                            |                                            |
| Calcium, mg/dL               | 9.57 (0.40)                 | -0.1 (-0.3, 0.1)                           | -0.1 (-0.3, 0.1)                           | 0.0 (-0.2, 0.3)                            |                                            |                                            |
| Total Protein, g/dL          | 7.11 (0.35)                 | -0.2 (-0.4, 0.1)                           | 0.1 (-0.1, 0.4)                            | 0.0 (-0.2, 0.3)                            |                                            |                                            |
| Albumin, g/dL                | 4.26 (0.23)                 | -0.1 (-0.2, 0.1)                           | 0.0 (-0.1, 0.2)                            | -0.0 (-0.2, 0.1)                           |                                            |                                            |
| Globulin, g/dL               | 2.84 (0.33)                 | -0.1 (-0.2, 0.1)                           | 0.1 (-0.1, 0.2)                            | -0.0 (-0.2, 0.2)                           |                                            |                                            |
| Albumin/Globulin Ratio       | 1.52 (0.20)                 | 0.0 (-0.1, 0.1)                            | -0.0 (-0.1, 0.0)                           | -0.0 (-0.1, 0.1)                           |                                            |                                            |
| Bilirubin, mg/dL             | 0.63 (0.31)                 | -0.0 (-0.2, 0.1)                           | 0.0 (-0.1, 0.2)                            | 0.1 (0.0, 0.3)                             |                                            |                                            |
| <i>Hepatic panel</i>         |                             |                                            |                                            |                                            |                                            |                                            |
| Alkaline Phosphatase, U/L    | 71.8 (23.2)                 | 1.7 (-5.7, 9.1)                            | 6.3 (-0.2, 12.8)                           | -1.4 (-8.9, 6.1)                           |                                            |                                            |
| AST, U/L                     | 19.6 (4.1)                  | 0.3 (-3.2, 3.7)                            | 0.8 (-2.3, 3.9)                            | 0.9 (-2.6, 4.3)                            |                                            |                                            |
| ALT, U/L                     | 16.1 (3.2)                  | 1.1 (-1.9, 4.2)                            | -0.0 (-2.7, 2.7)                           | 0.2 (-2.8, 3.3)                            |                                            |                                            |
| <i>Complete blood count</i>  |                             |                                            |                                            |                                            |                                            |                                            |

|                                             |               |                     |                    |                      |
|---------------------------------------------|---------------|---------------------|--------------------|----------------------|
| White blood cell count, 10 <sup>3</sup> /μL | 6.20 (1.51)   | -0.4 (-1.1, 0.3)    | -0.3 (-0.9, 0.3)   | 0.1 (-0.6, 0.8)      |
| Red blood cell count, 10 <sup>6</sup> /μL   | 4.54 (0.46)   | -0.1 (-0.2, 0.1)    | 0.0 (-0.1, 0.2)    | -0.0 (-0.2, 0.1)     |
| Hematocrit, %                               | 44.5 (13.7)   | 4.6 (-0.5, 9.7)     | 3.4 (-1.1, 8.0)    | 4.0 (-1.1, 9.2)      |
| Platelets count, 10 <sup>3</sup> /μL        | 219.6 (49.1)  | -12.6 (-42.3, 17.1) | 2.3 (-24.2, 28.8)  | 8.6 (-21.4, 38.6)    |
| Absolute Neutrophils, cell/μL               | 3756 (1439)   | -157 (-758, 431)    | 110 (-411, 631)    | 7 (-591, 604)        |
| Absolute Lymphocytes, cell/μL               | 1615 (521)    | -100 (-351, 152)    | 22 (-203, 268)     | 72 (-192, 329)       |
| Absolute Monocytes, cell/μL                 | 448.6 (138.4) | -1.9 (-66.9, 63.1)  | -5.1 (-62.0, 51.6) | -72.3 (-138.5, -6.1) |
| Absolute Eosinophils, cell/μL               | 163.4 (113.0) | -23.2 (-86.3, 39.8) | 4.8 (-50.6, 60.2)  | 25.3 (-40.2, 90.7)   |
| Absolute Basophils, cell/μL                 | 32.5 (21.5)   | -2.2 (-10.5, 6.0)   | -7.4 (-14.8, -0.1) | 6.4 (-1.9, 14.7)     |

Notes: ALT: Alanine Aminotransferase. AST: Aspartate aminotransferase. CI: Confidence Interval. Data are expressed as mean (SD). \* Change within groups is presented as adjusted mean change with 95% confidence interval, adjusted to age, sex and baseline status. Reference range is according to limits established by the American College of Sports Medicine [55]
